# Supplementary material
Source: PubMed Central journal article supplement (PMC2795718)
Supplement: en.2009-0523_2.pdf [file en.2009-0523_2.pdf]

**A)**

|                   |                         |    |
|-------------------|-------------------------|----|
| Shark AR          | PDAPAGGERFGPFYEACRQGA   | 34 |
| Sturgeon AR       | SPNNHFCGTFFENVFHGVRTPFQ | 34 |
| <i>Xenopus</i> AR | PPGKMIRGAFENLFLSVREALQ  | 35 |
| Chicken AR        | PPGRTFRGVFQTFQSVCEAFQ   | 35 |
| Mouse AR          | PPSKTYRGAFQNLFSVREAIQ   | 35 |
| Human AR          | PPSKTYRGAFQNLFSVREVIQ   | 35 |

**B)**

|                          |                            |     |
|--------------------------|----------------------------|-----|
| Shark AR                 | LTNDTARELCKAVSVSMGLNIDNNEL | 135 |
| Sturgeon AR              | TISETARELCKAVSVSLGLNIESNEM | 184 |
| Mosquitofish AR $\beta$  | TISETARELCKAVSVSLGLTMESSDM | 127 |
| Mosquitofish AR $\alpha$ | AYACPTLELSRAVSVSLGLDPLSSPL | 55  |
| Medaka AR $\beta$        | TISETARELCKAVSVSLGLTVESSET | 129 |
| Medaka AR $\alpha$       | TNACPTIGLSKAVSVSLGLDSLSSPL | 53  |
| <i>Xenopus</i> AR        | GISDSAKELCKAVSVSLGLSMEALEH | 167 |
| Chicken AR               | FLGDSAKELCKAVSASMGLAVETLEA | 147 |
| Mouse AR                 | TISDSAKELCKAVSVSMGLGVEALEH | 249 |
| Human AR                 | TISDNAKELCKAVSVSMGLGVEALEH | 250 |

**C)**

|                          |                           |                              |             |          |               |                     |     |
|--------------------------|---------------------------|------------------------------|-------------|----------|---------------|---------------------|-----|
| Shark AR                 | FQPQKTCLICGDEASGCHYGALTCG | SCKVFFKRAAEGKHFLCASRNDCTIDK  | VRRKNCFS    | SCRIRKCF | AAGMTILGGRKLN | ARPFQ               | 519 |
| Sturgeon AR              | FPPQRTCLICGDEASGCHYGALTCG | SCKVFFKRAAEGKQKYL            | CASRNDCTIDK | IRRKNCFS | SCRIRKCF      | KVGMTILGVRKLLKMKGAE | 563 |
| Mosquitofish AR $\beta$  | FPPQRTCLICGDEASGCHYGALTCG | SCKVFFKRAAEGKQKYL            | CASRNDCTIDK | IRRKNCFS | SCRIRKCF      | EAGMTILGARKLKKI-GQQ | 477 |
| Mosquitofish AR $\alpha$ | LSDRRVCQVCGDDASGCHYGAVTCG | SCKVFFKRAAAGKQNHLCASRNDCTIDK | IRRKNCFS    | SCRIRKCF | MSGMSIKGRRLK  | GAGQTR              | 387 |
| Medaka AR $\beta$        | FPPQRTCLICGDEASGCHYGALTCG | SCKVFFKRAAEGKQKYL            | CASRNDCTIDK | IRRKNCFS | SCRIRKCF      | EAGMTILGARKLKKI-GQQ | 466 |
| Medaka AR $\alpha$       | LSDRRVCQVCGDDASGCHYGAVTCG | SCKVFFKRAAAGKQNHLCASRNDCTIDK | IRRKNCFS    | SCRIRKCF | MSGMSIKGRRLK  | GAGQTR              | 386 |
| <i>Xenopus</i> AR        | FPPQKTCLICGDEASGCHYGALTCG | SCKVFFKRAAEGKQKYL            | CASRNDCTIDK | FRRKNCFS | SCRIRKCF      | EAGMTILGARKLKKLGNLK | 508 |
| Chicken AR               | FPPQKTCLICGDEASGCHYGALTCG | SCKVFFKRAAEGKQKYL            | CASRNDCTIDK | FRRKNCFS | SCRIRKCF      | EAGMTILGARKLKKLGSJK | 422 |
| Mouse AR                 | FPPQKTCLICGDEASGCHYGALTCG | SCKVFFKRAAEGKQKYL            | CASRNDCTIDK | FRRKNCFS | SCRIRKCF      | EAGMTILGARKLKKLGNLK | 618 |
| Human AR                 | FPPQKTCLICGDEASGCHYGALTCG | SCKVFFKRAAEGKQKYL            | CASRNDCTIDK | FRRKNCFS | SCRIRKCF      | EAGMTILGARKLKKLGNLK | 637 |

P-box
D-box

NES
NLS
