# Supplementary material
Source: PubMed Central journal article supplement (PMC2795718)
Supplement: en.2009-0523_9.pdf [file en.2009-0523_9.pdf]

Supplementary Table 1. Accession number of sequences used for phylogenetic analysis (Fig. 2A)

| #  | Source | Sequence ID <sup>a</sup> | Annotation                                                               | Common name                      |
|----|--------|--------------------------|--------------------------------------------------------------------------|----------------------------------|
| 1  | G      | M27430                   | <i>Homo sapiens</i> androgen receptor protein.                           | Human AR                         |
| 2  | T      | AB193190                 | <i>Gallus gallus</i> androgen receptor protein.                          | Chicken AR                       |
| 3  | G      | AB186356                 | <i>Alligator mississippiensis</i> androgen receptor protein.             | American alligator AR            |
| 4  | G      | U67129                   | <i>Xenopus laevis</i> androgen receptor alpha isoform protein.           | African cawed frog AR            |
| 5  | T      | AB428795                 | <i>Polypterus senegalus</i> androgen receptor protein.                   | Gray bichir AR                   |
| 6  | T      | AB213020                 | <i>Acipenser ruthenus x Huso huso</i> (bester) androgen receptor protein | Sturgeon AR                      |
| 7  | T      | AB428796                 | <i>Osteoglossum bicirrhosum</i> androgen receptor protein.               | Silver arowana AR                |
| 8  | G      | AB025361                 | <i>Anguilla japonica</i> androgen receptor beta protein.                 | Japanese eel AR $\beta$          |
| 9  | G      | EF440290                 | <i>Danio rerio</i> androgen receptor protein.                            | Zebrafish AR                     |
| 10 | T      | AB252679                 | <i>Oryzias latipes</i> androgen receptorpr beta protein.                 | Medaka AR $\beta$                |
| 11 | E      | ENSGACP00000026868       | <i>Gasterosteus aculeatus</i> androgen receptor beta 2 protein.          | Stickleback AR                   |
| 12 | G      | AB023960                 | <i>Anguilla japonica</i> androgen receptor alpha protein.                | Japanese eel AR $\alpha$         |
| 13 | E      | ENSGACP00000024489       | <i>Gasterosteus aculeatus</i> androgen receptor protein.                 | Stickleback AR                   |
| 14 | T      | AB252233                 | <i>Oryzias latipes</i> androgen receptor alpha protein                   | Medaka AR $\alpha$               |
| 15 | T      | AB174849                 | <i>Gambusia affinis</i> androgen receptor alpha protein.                 | Western mosquitofish AR $\alpha$ |
| 16 | G      | DQ382340                 | <i>Leucoraja erinacea</i> androgen receptor protein.                     | Little skate AR                  |
| 17 | T      | AB213019                 | <i>Chiloscyllium punctatum</i> androgen receptor protein.                | Brownbanded bambooshark AR       |
| 18 | G      | AY525610                 | <i>Homo sapiens</i> progesterone receptor protein.                       | Human PR                         |
| 19 | G      | AF319596                 | <i>Xenopus laevis</i> oviduct progesterone receptor protein.             | African cawed frog PR            |
| 20 | G      | AB032075                 | <i>Anguilla japonica</i> progesterone receptor protein.                  | Japanese eel PR                  |
| 21 | G      | AB028024                 | <i>Anguilla japonica</i> progestogen receptor type 2 protein.            | Japanese eel PR type 2           |

<sup>a</sup>Sequences were retrieved from GenBank (G),Ensembl (E), or determined in our study (T).
