# Supplementary material
Source: PubMed Central journal article supplement (PMC2795718)
Supplement: en.2009-0523_10.pdf [file en.2009-0523_10.pdf]

Supplementary Table 2. Accession number of sequences used for phylogenetic analysis (Fig. 2B)

| #  | Source | Sequence ID <sup>a</sup> | Annotation                                                                      |
|----|--------|--------------------------|---------------------------------------------------------------------------------|
| 1  | E      | ENSGACP00000026868       | <i>Gasterosteus aculeatus</i> androgen receptor protein.                        |
| 2  | G      | AB012096                 | <i>Oncorhynchus mykiss</i> androgen receptor beta protein.                      |
| 3  | G      | AB025361                 | <i>Anguilla japonica</i> androgen receptor beta protein.                        |
| 4  | G      | EU517118                 | <i>Spinibarbus denticulatus</i> androgen receptor protein                       |
| 5  | E      | ENSDARP00000088795       | <i>Danio rerio</i> androgen receptor protein.                                   |
| 6  | G      | AY090897                 | <i>Carassius auratus</i> androgen receptor protein.                             |
| 7  | G      | AY727529                 | <i>Pimephales promelas</i> androgen receptor protein.                           |
| 8  | G      | AY701761                 | <i>Micropogonias undulatus</i> nuclear androgen receptor protein.               |
| 9  | G      | AB017158                 | <i>Pagrus major</i> androgen receptor protein.                                  |
| 10 | G      | AB012095                 | <i>Oncorhynchus mykiss</i> androgen receptor alpha protein.                     |
| 11 | G      | AB023960                 | <i>Anguilla japonica</i> androgen receptor alpha protein.                       |
| 12 | G      | AY647256                 | <i>Dicentrarchus labrax</i> androgen receptor protein.                          |
| 13 | E      | ENSTNIP00000014780       | <i>Tetraodon nigroviridis</i> androgen receptor protein.                        |
| 14 | G      | AF326200                 | <i>Halichoeres trimaculatus</i> androgen receptor protein.                      |
| 15 | G      | AY219702                 | <i>Acanthopagrus schlegelii</i> androgen receptor protein.                      |
| 16 | E      | ENSTRUP00000031457       | <i>Takifugu rubripes</i> androgen receptor protein.                             |
| 17 | T      | AB099303                 | <i>Gambusia affinis</i> androgen receptor beta protein.                         |
| 18 | G      | AY082342                 | <i>Astatotilapia burtoni</i> androgen receptor beta protein.                    |
| 19 | G      | DQ339105                 | <i>Kryptolebias marmoratus</i> androgen receptor protein.                       |
| 20 | T      | AB252679                 | <i>Oryzias latipes</i> androgen receptor beta protein                           |
| 21 | G      | AB045212                 | <i>Oreochromis niloticus</i> androgen receptor beta protein.                    |
| 22 | T      | AB193190                 | <i>Gallus gallus</i> androgen receptor protein.                                 |
| 23 | E      | ENSP00000379359          | <i>Homo sapiens</i> androgen receptor protein.                                  |
| 24 | G      | AF532914                 | <i>Taeniopygia guttata</i> androgen receptor protein.                           |
| 25 | E      | ENSXETP00000011091       | <i>Xenopus tropicalis</i> androgen receptor protein.                            |
| 26 | T      | AB428795                 | <i>Polypterus senegalus</i> androgen receptor protein.                          |
| 27 | T      | AB213020                 | <i>Acipenser ruthenus</i> x <i>Huso huso</i> (bester) androgen receptor protein |
| 28 | T      | AB428796                 | <i>Osteoglossum bicirrhosum</i> androgen receptor protein.                      |
| 29 | T      | AB213019                 | <i>Chiloscyllium punctatum</i> androgen receptor protein.                       |
| 30 | G      | DQ382340                 | <i>Leucoraja erinacea</i> androgen receptor protein.                            |
| 31 | E      | ENSTNIP00000018864       | <i>Tetraodon nigroviridis</i> androgen receptor protein.                        |
| 32 | E      | ENSGACP00000024489       | <i>Gasterosteus aculeatus</i> androgen receptor protein.                        |
| 33 | E      | ENSTRUP00000012893       | <i>Takifugu rubripes</i> androgen receptor protein.                             |
| 34 | T      | AB252233                 | <i>Oryzias latipes</i> androgen receptor alpha protein.                         |
| 35 | T      | AB174849                 | <i>Gambusia affinis</i> androgen receptor alpha protein.                        |
| 36 | G      | AB045211                 | <i>Oreochromis niloticus</i> androgen receptor alpha protein.                   |
| 37 | G      | AF121257                 | <i>Haplochromis burtoni</i> androgen receptor protein.                          |

<sup>a</sup>Sequences were retrieved from GenBank (G),Ensembl (E), or determined in our study (T).
