# Supplementary material
Source: PubMed Central journal article supplement (PMC2795718)

0.1 substitutions / site

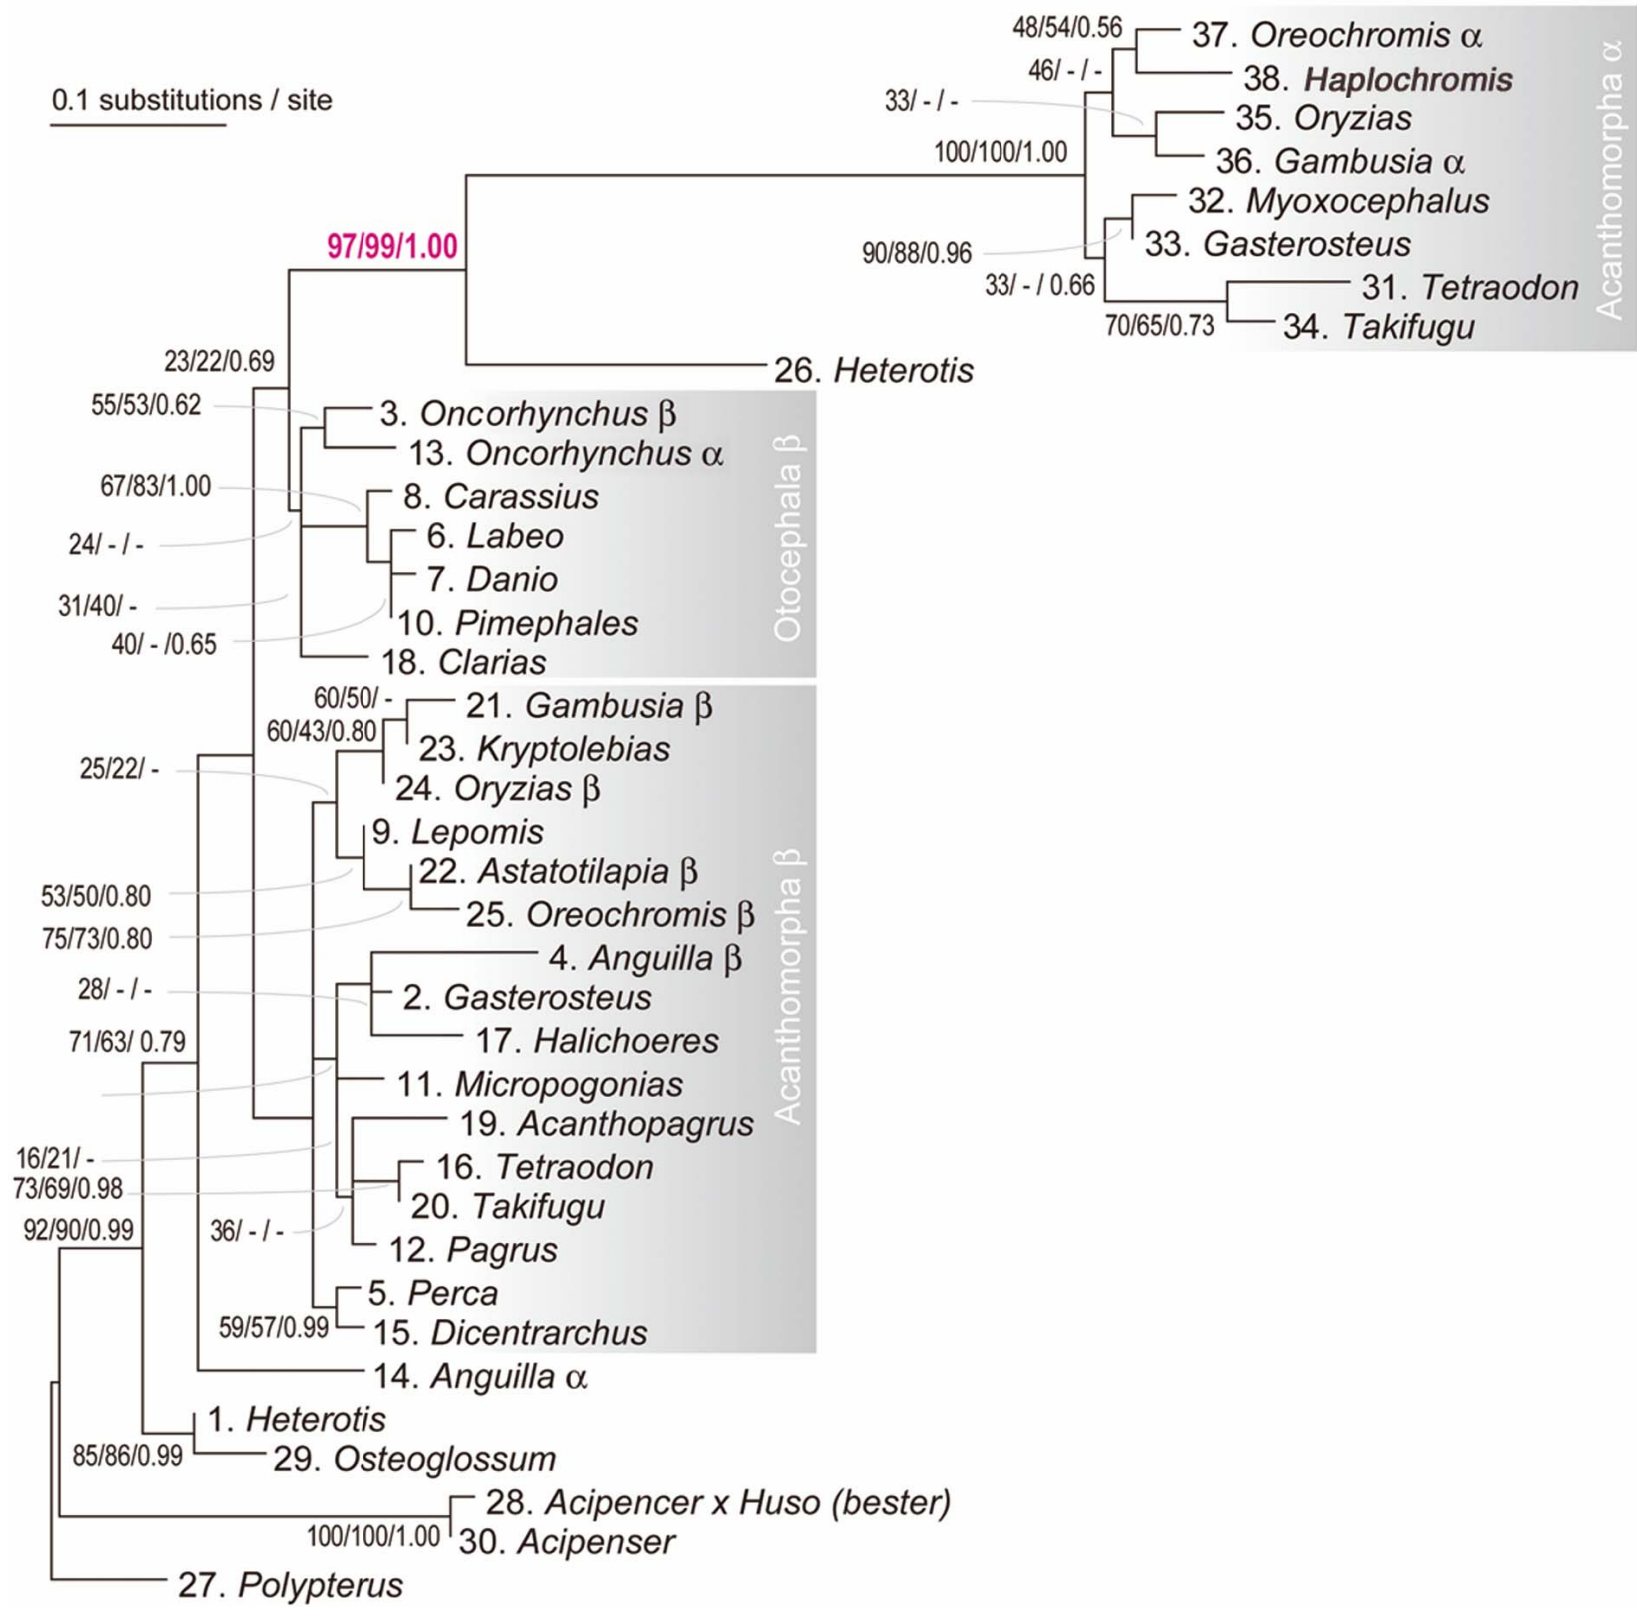

Supplement: en.2009-0523_1.pdf [file en.2009-0523_1.pdf]

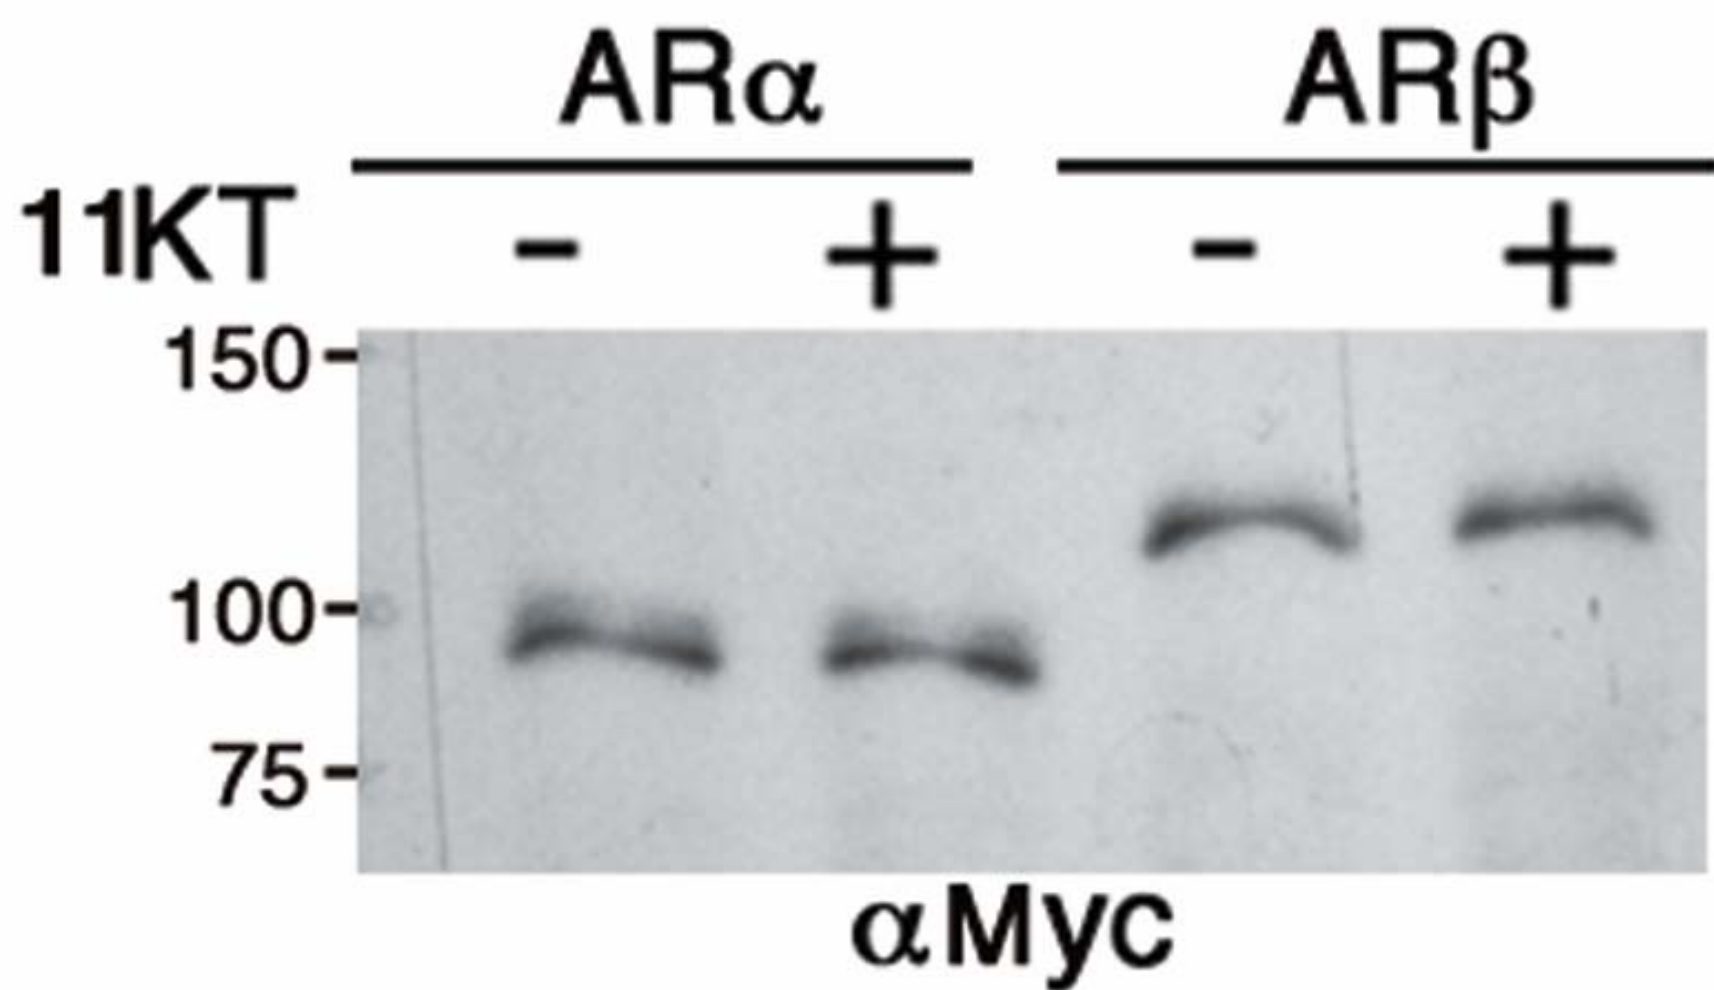

$\alpha$ -tubulin

Supplement: en.2009-0523_3.pdf [file en.2009-0523_3.pdf]

A)

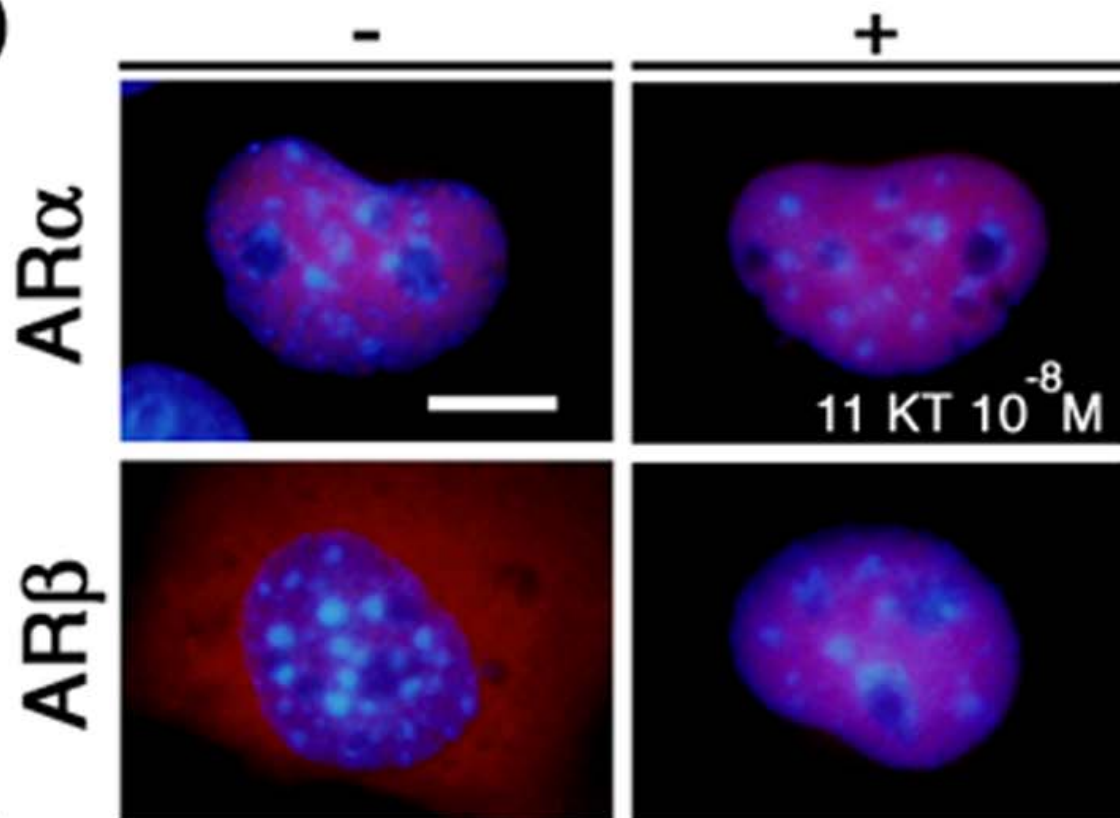

B)

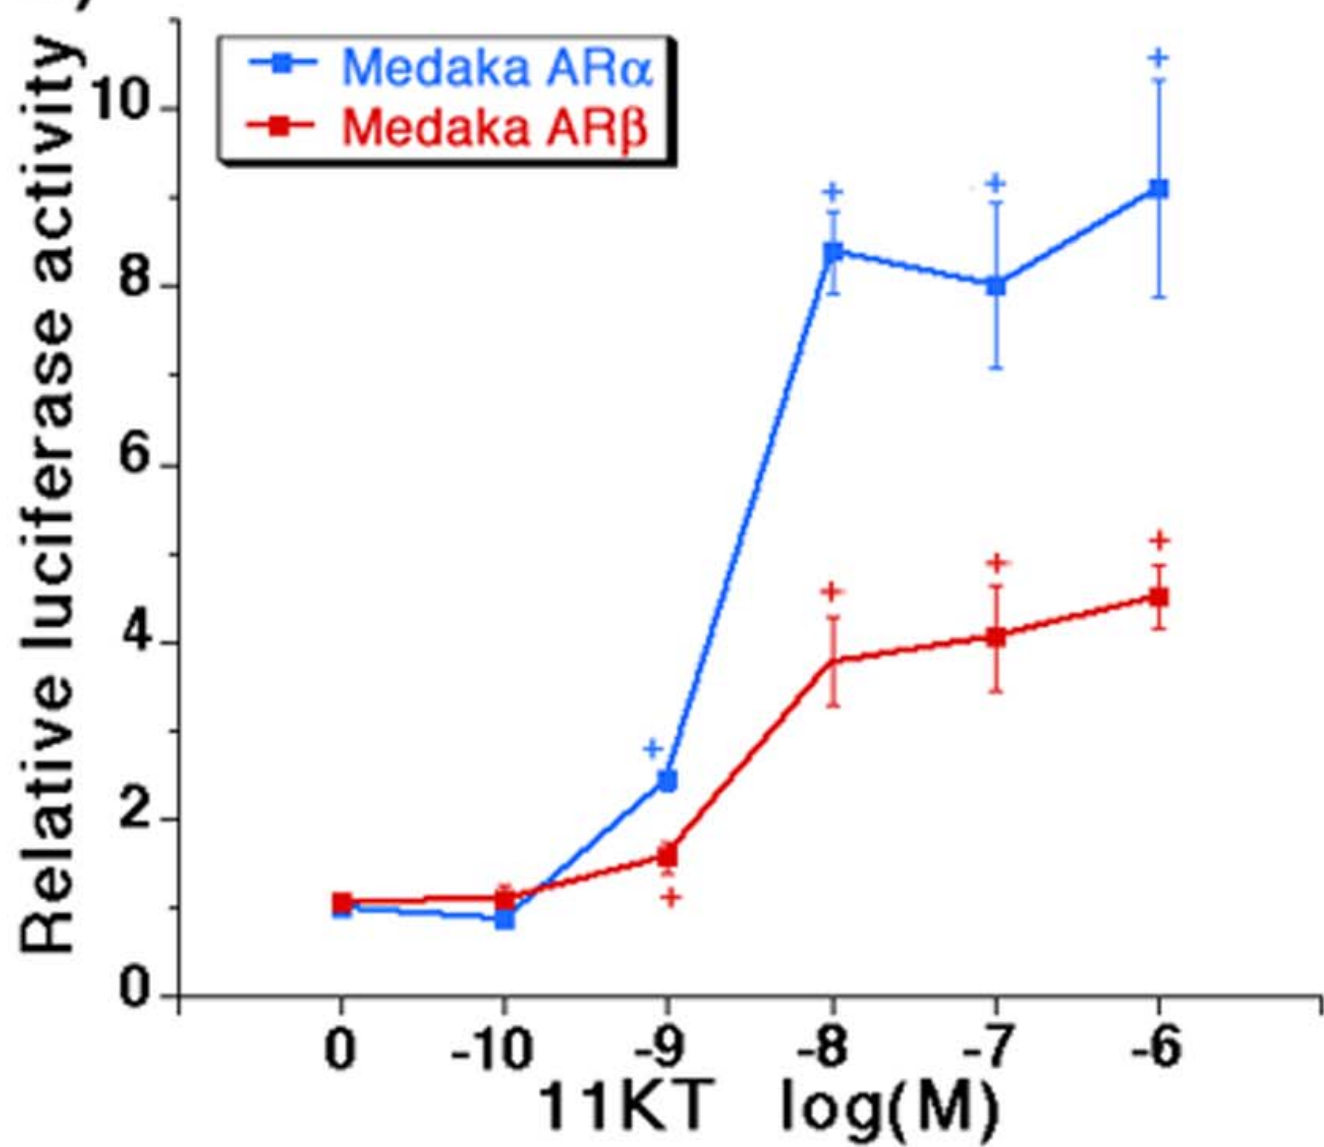

Supplement: en.2009-0523_4.pdf [file en.2009-0523_4.pdf]

Mosquitofish AR $\alpha$

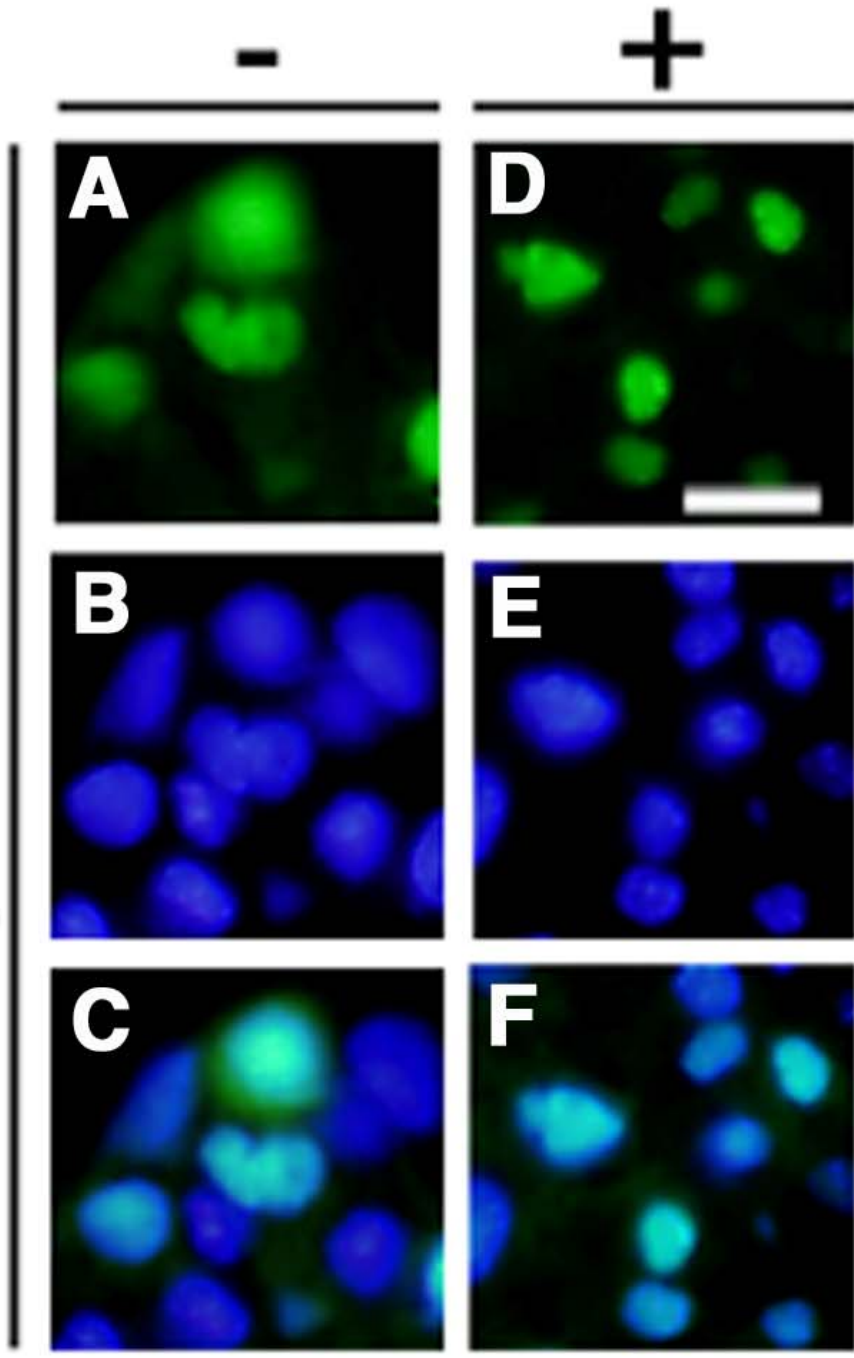

Mosquitofish AR $\beta$

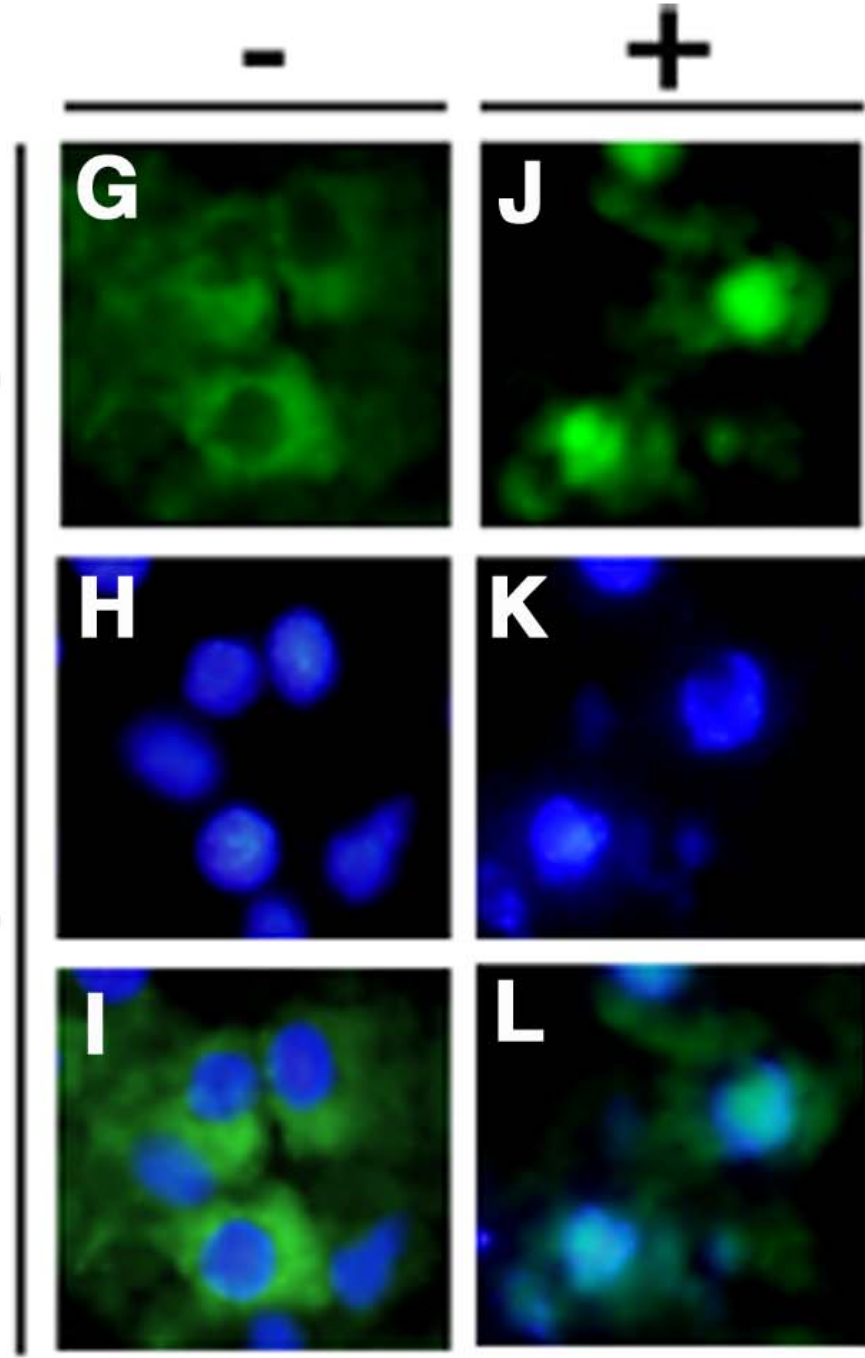

Supplement: en.2009-0523_5.pdf [file en.2009-0523_5.pdf]

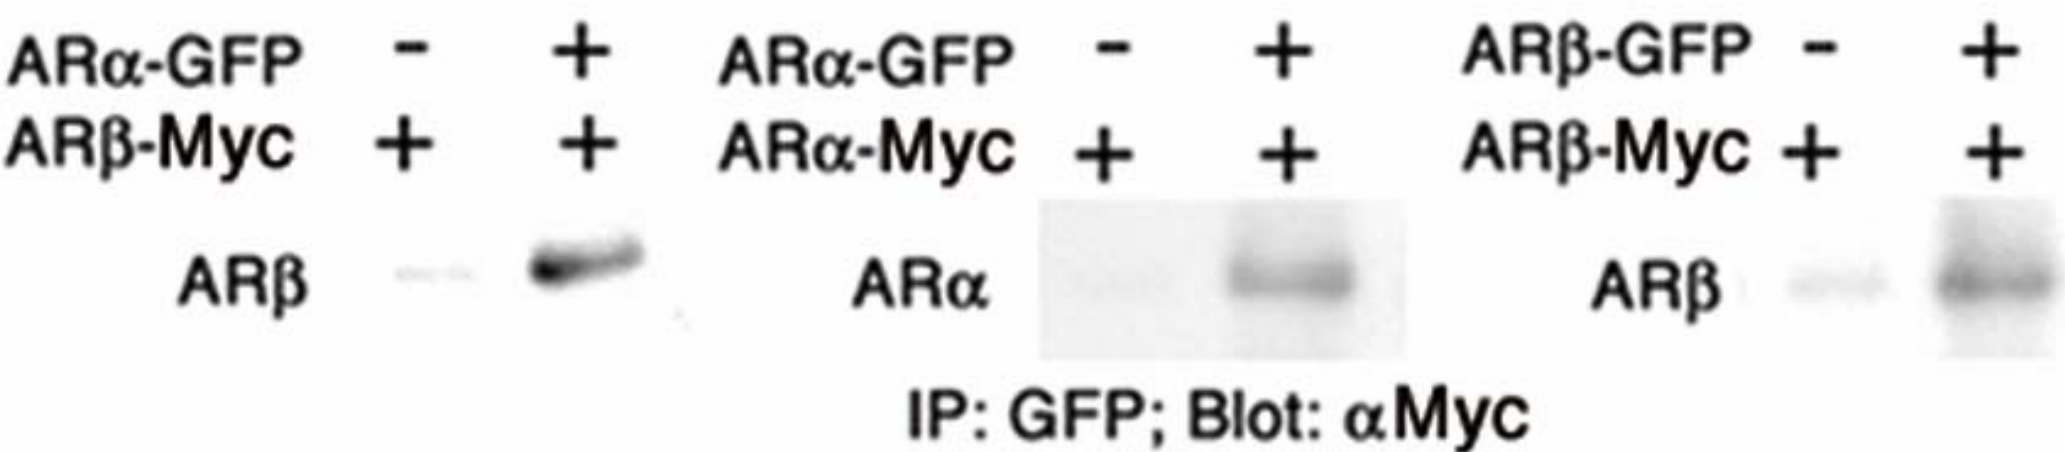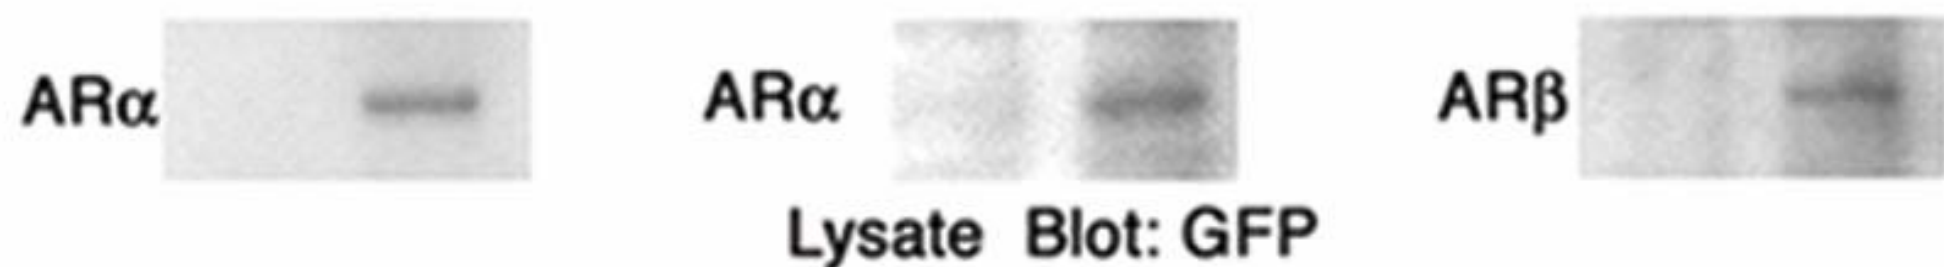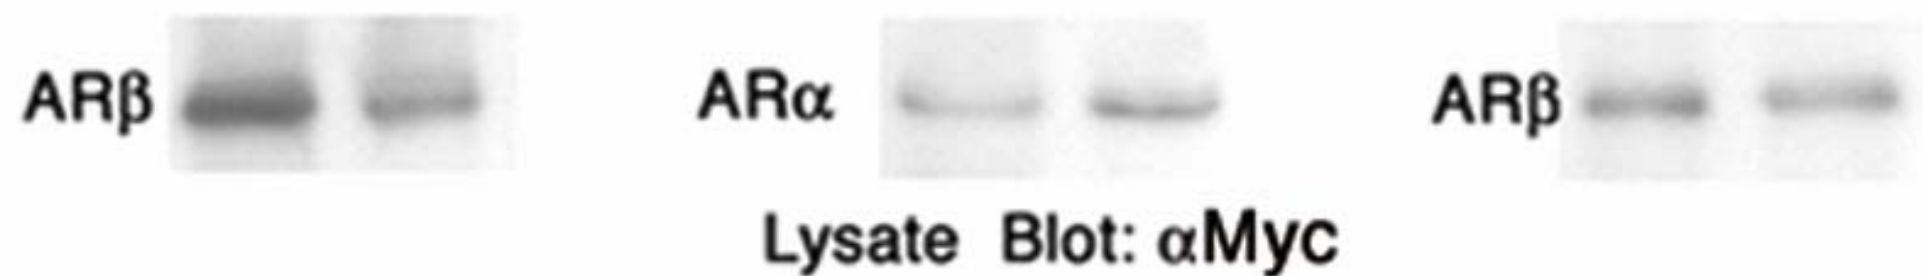

Supplement: en.2009-0523_6.pdf [file en.2009-0523_6.pdf]

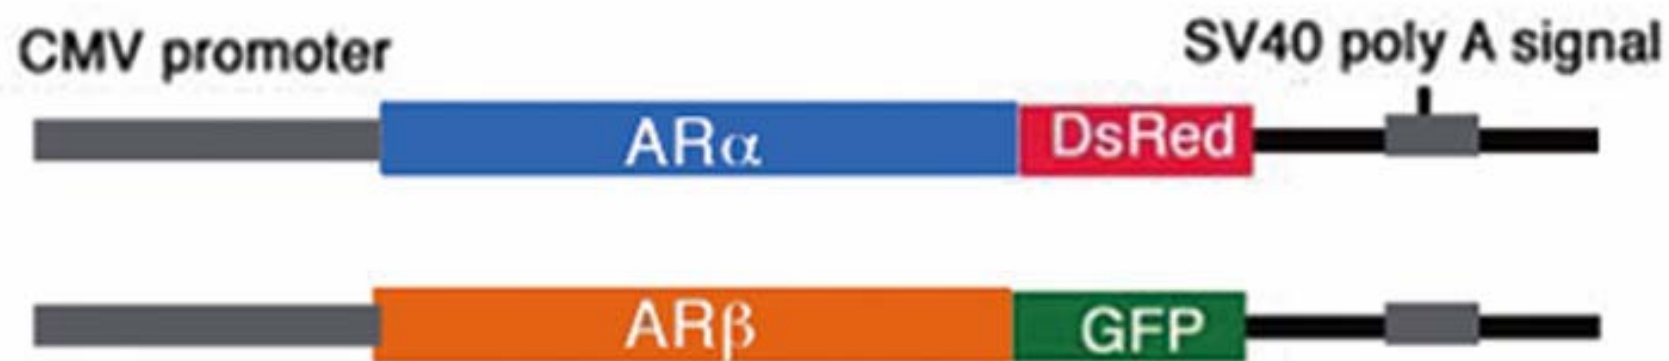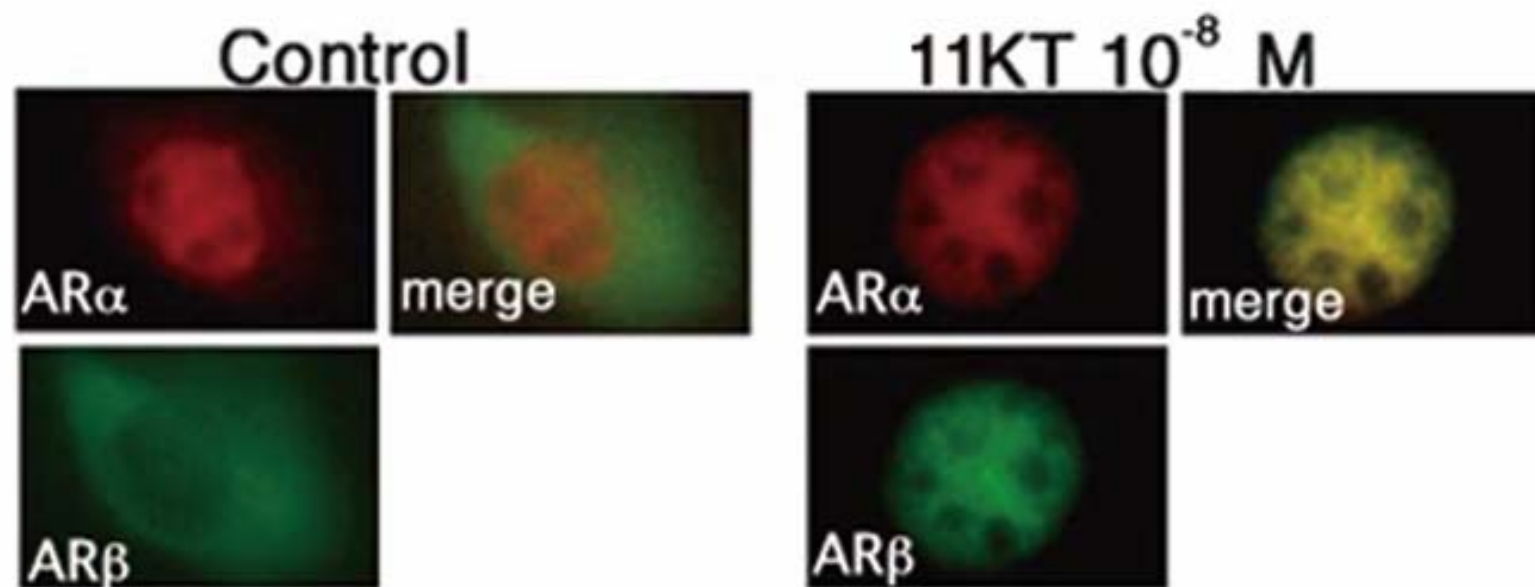

Supplement: en.2009-0523_7.pdf [file en.2009-0523_7.pdf]

### A) AR $\beta\alpha\beta$ -DsRed

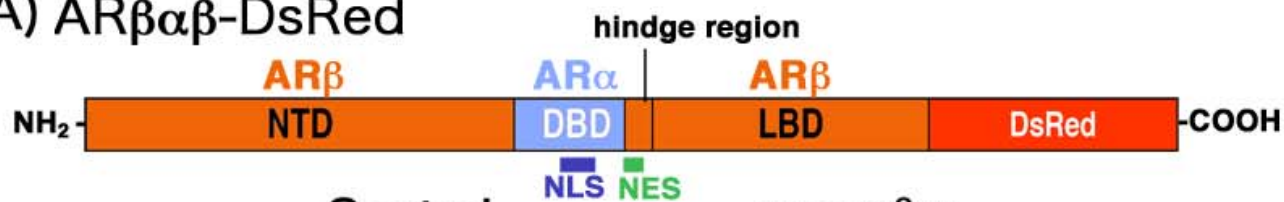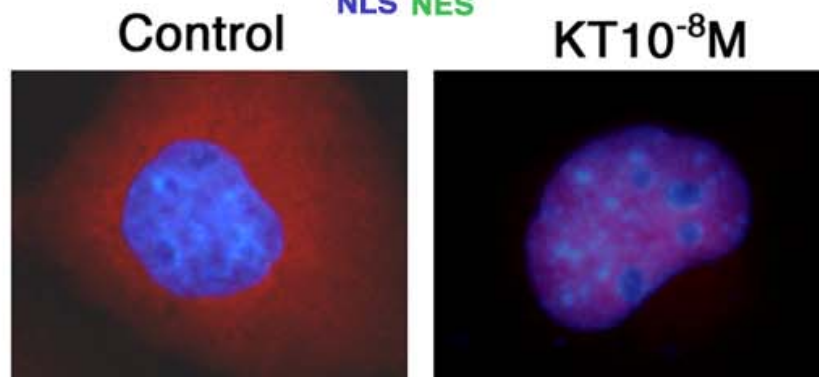

### B) AR $\alpha$ $\Delta$ NTD -GFP

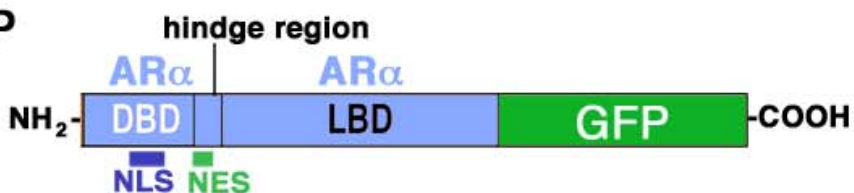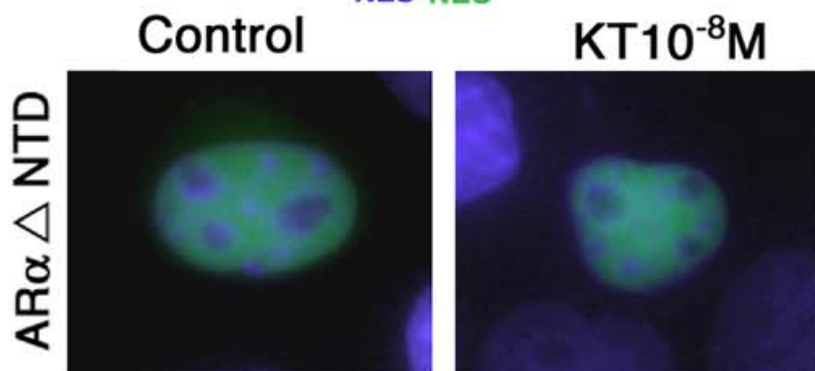

### C) AR $\alpha\alpha\beta$ -DsRed

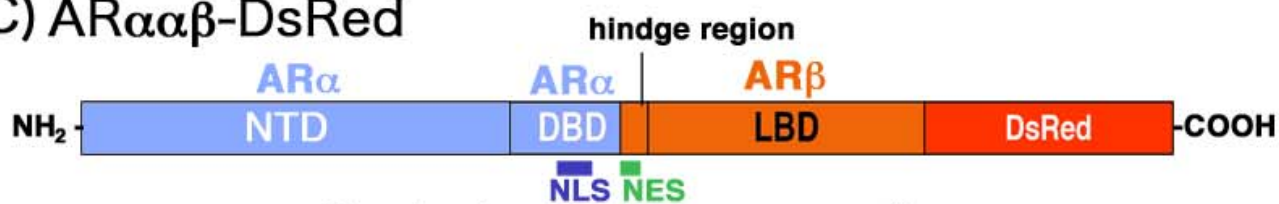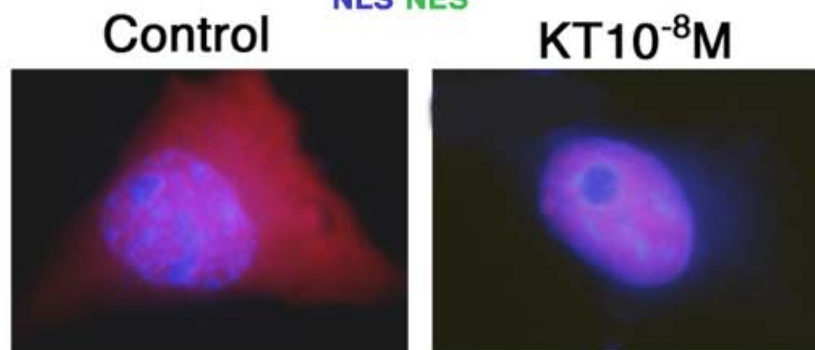

Supplement: en.2009-0523_8.pdf [file en.2009-0523_8.pdf]
